# Supplementary material for: Post-Functionalization of Organometallic Complexes via Click-Reaction
Source: MDPI journal article supplement (doi:10.3390/molecules27196494), 2022-10-01
Supplement: s1 [file s1]

## **Supplementary Information**

### **Post-functionalization of organometallic complexes *via* click-reaction**

Stanislav Petrovskii, Viktoria Khistiaeva, Aleksandra Paderina, Evgenia Abramova and Elena Grachova \*

Institute of Chemistry, St Petersburg University, 198504 St. Petersburg, Russia

Correspondence: [e.grachova@spbu.ru](mailto:e.grachova@spbu.ru)

## Content

Content 2

|                                                                                                                                                                                                    |    |
|----------------------------------------------------------------------------------------------------------------------------------------------------------------------------------------------------|----|
| X-ray structure determination.....                                                                                                                                                                 | 4  |
| <b>Table S1.</b> Crystallographic data for compound <b>Pt(dtbpy)<sup>C</sup></b> . ....                                                                                                            | 5  |
| <b>Figure S1.</b> <sup>1</sup> H NMR spectra of <b>NN</b> compounds <b>XP</b> (X = 1–3). Aromatic (left) and aliphatic (right) regions are shown on a different vertical scale. ....               | 6  |
| <b>Figure S2.</b> <sup>1</sup> H NMR spectra of <b>Re1<sup>X</sup></b> complexes. The residual solvent peak of CDCl <sub>3</sub> is marked by asterisk. ....                                       | 7  |
| <b>Figure S3.</b> <sup>1</sup> H NMR spectra of <b>Re2<sup>X</sup></b> complexes. The residual solvent peak of CDCl <sub>3</sub> is marked by asterisk. ....                                       | 8  |
| <b>Figure S4.</b> <sup>1</sup> H NMR spectra of <b>Re3<sup>X</sup></b> complexes. The resonances of admixtures are marked by asterisks. ....                                                       | 9  |
| <b>Figure S5.</b> ESI <sup>+</sup> MS spectra of <b>Re1<sup>X</sup></b> complexes with isotope pattern of key signals. ....                                                                        | 10 |
| <b>Figure S6.</b> ESI <sup>+</sup> MS spectra of <b>Re2<sup>X</sup></b> complexes with isotope pattern of key signals. ....                                                                        | 11 |
| <b>Figure S7.</b> ESI <sup>+</sup> MS spectra of <b>Re3<sup>X</sup></b> complexes with isotope pattern of key signals. ....                                                                        | 12 |
| <b>Figure S8.</b> <sup>1</sup> H NMR spectra of <b>Ir(ppy)1<sup>X</sup></b> complexes. ....                                                                                                        | 13 |
| <b>Figure S9.</b> <sup>1</sup> H NMR spectra of <b>Ir(ppy)2<sup>X</sup></b> complexes. ....                                                                                                        | 14 |
| <b>Figure S10.</b> <sup>1</sup> H NMR spectra of <b>Ir(dfppy)1<sup>X</sup></b> complexes. ....                                                                                                     | 15 |
| <b>Figure S11.</b> <sup>1</sup> H NMR spectra of <b>Ir(dfppy)2<sup>X</sup></b> complexes. ....                                                                                                     | 15 |
| <b>Figure S12.</b> ESI <sup>+</sup> MS spectra of <b>Ir(ppy)1<sup>X</sup></b> complexes with isotope pattern of key signals. ..                                                                    | 16 |
| <b>Figure S13.</b> ESI <sup>+</sup> MS spectra of <b>Ir(ppy)2<sup>X</sup></b> complexes with isotope pattern of key signals. ..                                                                    | 17 |
| <b>Figure S14.</b> ESI <sup>+</sup> MS spectra of <b>Ir(dfppy)1<sup>X</sup></b> complexes with isotope pattern of key signals....<br>.....                                                         | 18 |
| <b>Figure S15.</b> ESI <sup>+</sup> MS spectra of <b>Ir(dfppy)2<sup>P</sup></b> complexes with isotope pattern of key signals....<br>.....                                                         | 19 |
| <b>Figure S16.</b> <sup>1</sup> H NMR spectra of <b>Pt1<sup>X</sup></b> complexes. Asterisks mark the resonances of admixtures and the residual solvent peak of CDCl <sub>3</sub> (7.29 ppm). .... | 20 |
| <b>Figure S17.</b> <sup>1</sup> H NMR spectra of <b>Pt2<sup>X</sup></b> complexes. Asterisks mark the resonances of admixtures and the residual solvent peak of CDCl <sub>3</sub> (7.29 ppm). .... | 21 |

|                    |                                                                                                                                          |    |
|--------------------|------------------------------------------------------------------------------------------------------------------------------------------|----|
| <b>Figure S18.</b> | $^1\text{H}$ NMR spectrum of <b>Pt(btbp)<sup>C</sup></b> complexes in aromatic region, DMSO-d <sub>6</sub> , RT. .                       | 22 |
| <b>Figure S19.</b> | $^1\text{H}^1\text{H}$ COSY NMR spectrum of <b>Pt(btbp)<sup>C</sup></b> complexes in aromatic region, DMSO-d <sub>6</sub> , RT. ....     | 22 |
| <b>Figure S20.</b> | ESI <sup>+</sup> MS spectrum of <b>Pt(dtbp)<sup>C</sup></b> complex with isotope pattern of key signals.                                 | 23 |
| <b>Figure S21.</b> | Molecular structure of <b>Pt(dtbp)<sup>C</sup></b> complex with key atoms numeration. ....                                               | 23 |
| <b>Table S2.</b>   | Selected structural parameters for compound <b>Pt(dtbp)<sup>C</sup></b> and literature data for Pt(II) triazolyl derivatives [5,6]. .... | 24 |
| <b>Table S3.</b>   | Photophysical properties of “clicked” complexes <b>ReX<sup>C</sup></b> and <b>IrX<sup>C</sup></b> , DCE, r.t., 10 <sup>-5</sup> M. ....  | 24 |
| <b>References</b>  | .....                                                                                                                                    | 25 |

### X-ray structure determination

The crystal structure of **Pt(dtpby)c** was determined by the means of single crystal X-ray diffraction analysis. Crystal was fixed on a micro mount and the diffraction data have been collected on the Agilent Supernova diffractometer at a temperature of 170K using monochromated Cu  $K_\alpha$  radiation. Data were integrated and corrected for background, Lorentz, and polarization effects. An empirical absorption correction based on spherical harmonics implemented in the SCALE3 ABSPACK algorithm was applied in *CrysAlisPro* program [1]. The unit-cell parameters (Table S1) were refined by the least-squares techniques. The structure were solved by dual-space algorithm and refined using the *SHELX* programs [2,3] incorporated in the *OLEX2* program package [4]. The final model included coordinates and anisotropic displacement parameters for all non-H atoms. The carbon-bound H atoms were placed in calculated positions and were included in the refinement in the ‘riding’ model approximation,  $U_{iso}(H)$  set to  $1.5U_{eq}(C)$  and C–H 0.96 Å for the CH<sub>3</sub> groups,  $U_{iso}(H)$  set to  $1.2U_{eq}(C)$  and C–H 0.97 Å for the CH<sub>2</sub> groups,  $U_{iso}(H)$  set to  $1.2U_{eq}(C)$  and C–H 0.93 Å for the CH groups. Supplementary crystallographic data for this paper have been deposited at Cambridge Crystallographic Data Centre (CCDC 2204302) and can be obtained free of charge via [www.ccdc.cam.ac.uk/structures/](http://www.ccdc.cam.ac.uk/structures/).

**Table S1.** Crystallographic data for compound **Pt(dtbpy)<sup>C</sup>**.

|                                                            |                                                     |
|------------------------------------------------------------|-----------------------------------------------------|
| Compound                                                   | <b>Pt(dtbpy)<sup>C</sup></b>                        |
| Formula                                                    | C <sub>49</sub> H <sub>52</sub> N <sub>10</sub> OPt |
| Crystal system                                             | monoclinic                                          |
| <i>a</i> (Å)                                               | 11.56500(10)                                        |
| <i>b</i> (Å)                                               | 20.6552(2)                                          |
| <i>c</i> (Å)                                               | 18.3102(2)                                          |
| $\alpha$ (°)                                               | 90                                                  |
| $\beta$ (°)                                                | 99.1890(10)                                         |
| $\gamma$ (°)                                               | 90                                                  |
| <i>V</i> (Å <sup>3</sup> )                                 | 4317.76(7)                                          |
| Molecular weight                                           | 992.09                                              |
| Space group (number)                                       | <i>P</i> 2 <sub>1</sub> / <i>n</i> (14)             |
| $\mu$ (mm <sup>-1</sup> )                                  | 6.473                                               |
| Temperature (K)                                            | 170(100)                                            |
| <i>Z</i>                                                   | 4                                                   |
| $\rho_{\text{calc}}$ (g/cm <sup>-3</sup> )                 | 1.526                                               |
| Crystal size (mm <sup>3</sup> )                            | 0.12×0.15×0.21                                      |
| Diffractometer                                             | SuperNova, Dual, Cu at zero, Atlas                  |
| Radiation                                                  | Cu <i>K</i> <sub><math>\alpha</math></sub>          |
| Total reflections                                          | 71362                                               |
| Unique reflections                                         | 8187                                                |
| Angle range 2 $\theta$ (°)                                 | 6.50 to 140.00 (0.82 Å)                             |
| Reflections with $ F_o  \geq 4\sigma_F$                    | 7906                                                |
| <i>R</i> <sub>int</sub>                                    | 0.0406                                              |
| <i>R</i> <sub><math>\sigma</math></sub>                    | 0.0154                                              |
| <i>R</i> <sub>1</sub> ( $ F_o  \geq 4\sigma_F$ )           | 0.0247                                              |
| <i>wR</i> <sub>2</sub> ( $ F_o  \geq 4\sigma_F$ )          | 0.0645                                              |
| <i>R</i> <sub>1</sub> (all data)                           | 0.0254                                              |
| <i>wR</i> <sub>2</sub> (all data)                          | 0.0650                                              |
| Goodness-of-fit on <i>F</i> <sup>2</sup>                   | 1.107                                               |
| $\rho_{\text{max}}, \rho_{\text{min}}$ (e/Å <sup>3</sup> ) | 3.17/−0.62                                          |
| CCDC number                                                | 2204302                                             |

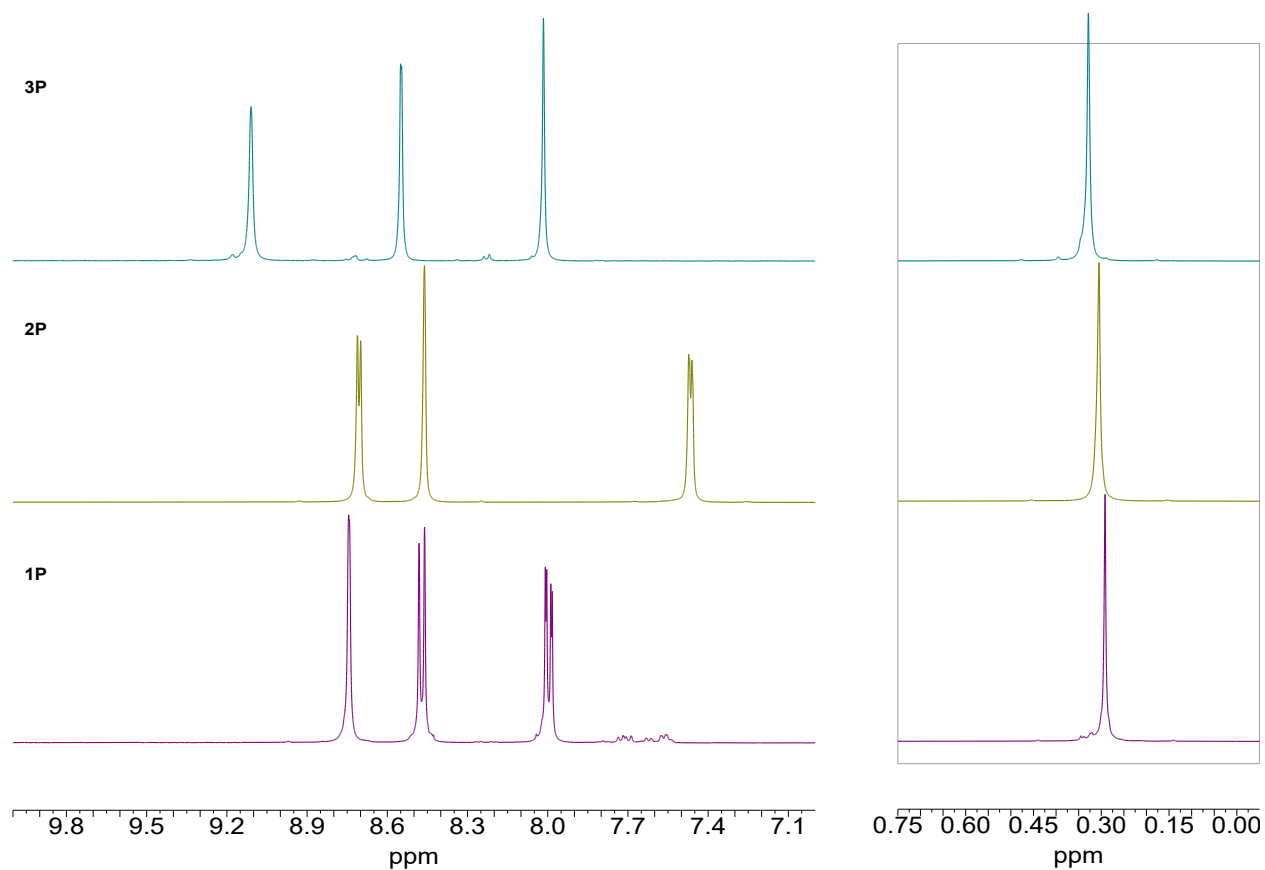

**Figure S1.**  $^1\text{H}$  NMR spectra of NN compounds **XP** ( $X = 1-3$ ). Aromatic (left) and aliphatic (right) regions are shown on a different vertical scale.

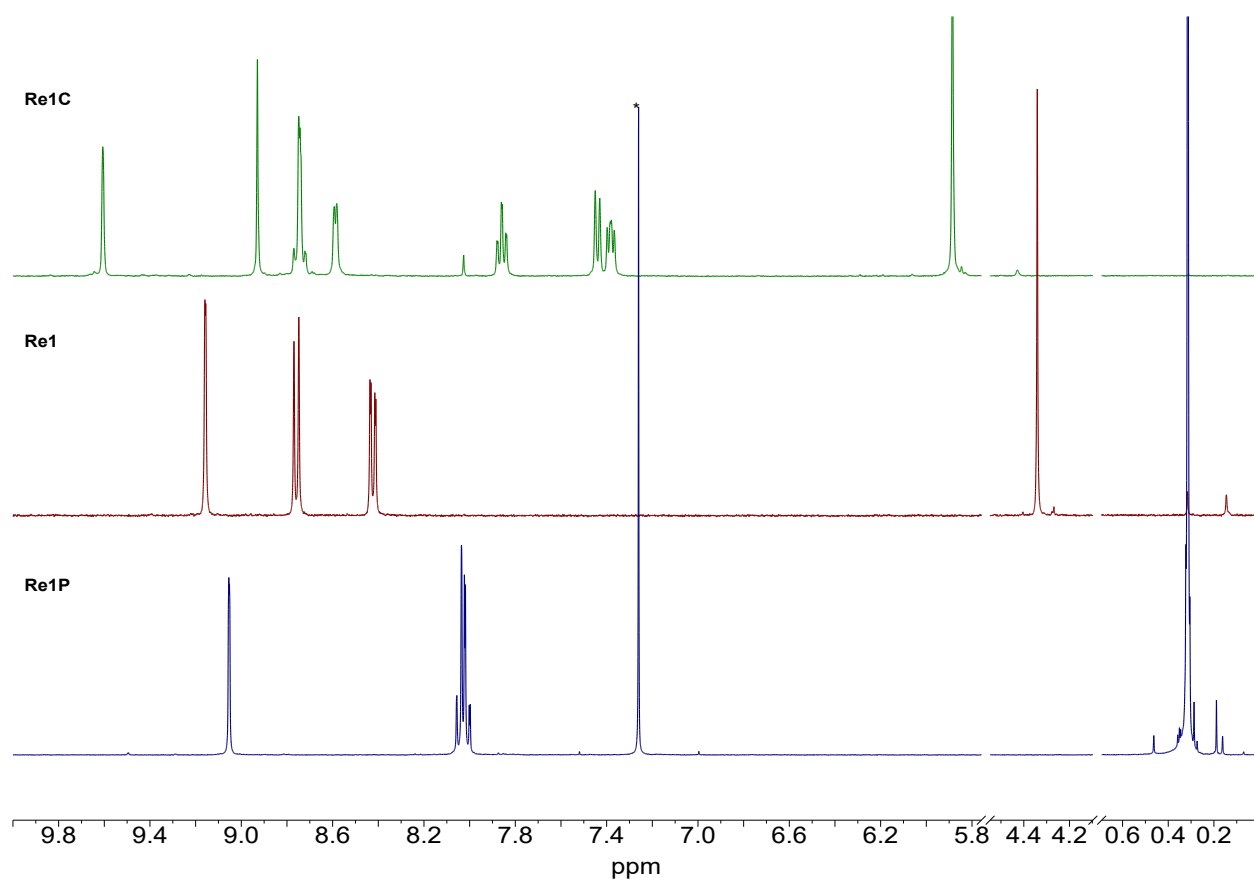

**Figure S2.**  $^1\text{H}$  NMR spectra of **Re1<sup>x</sup>** complexes. The residual solvent peak of  $\text{CDCl}_3$  is marked by asterisk.

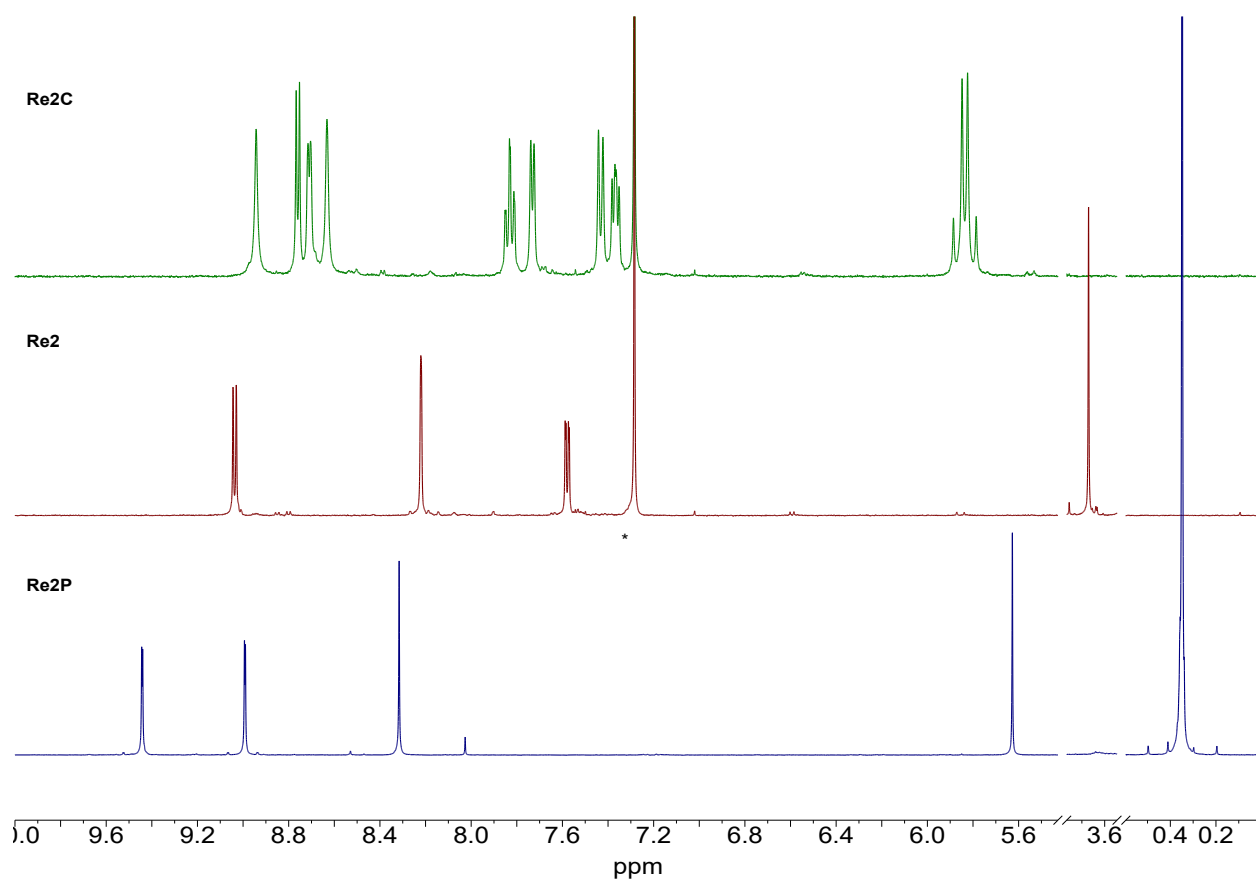

**Figure S3.**  $^1\text{H}$  NMR spectra of **Re2<sup>x</sup>** complexes. The residual solvent peak of  $\text{CDCl}_3$  is marked by asterisk.



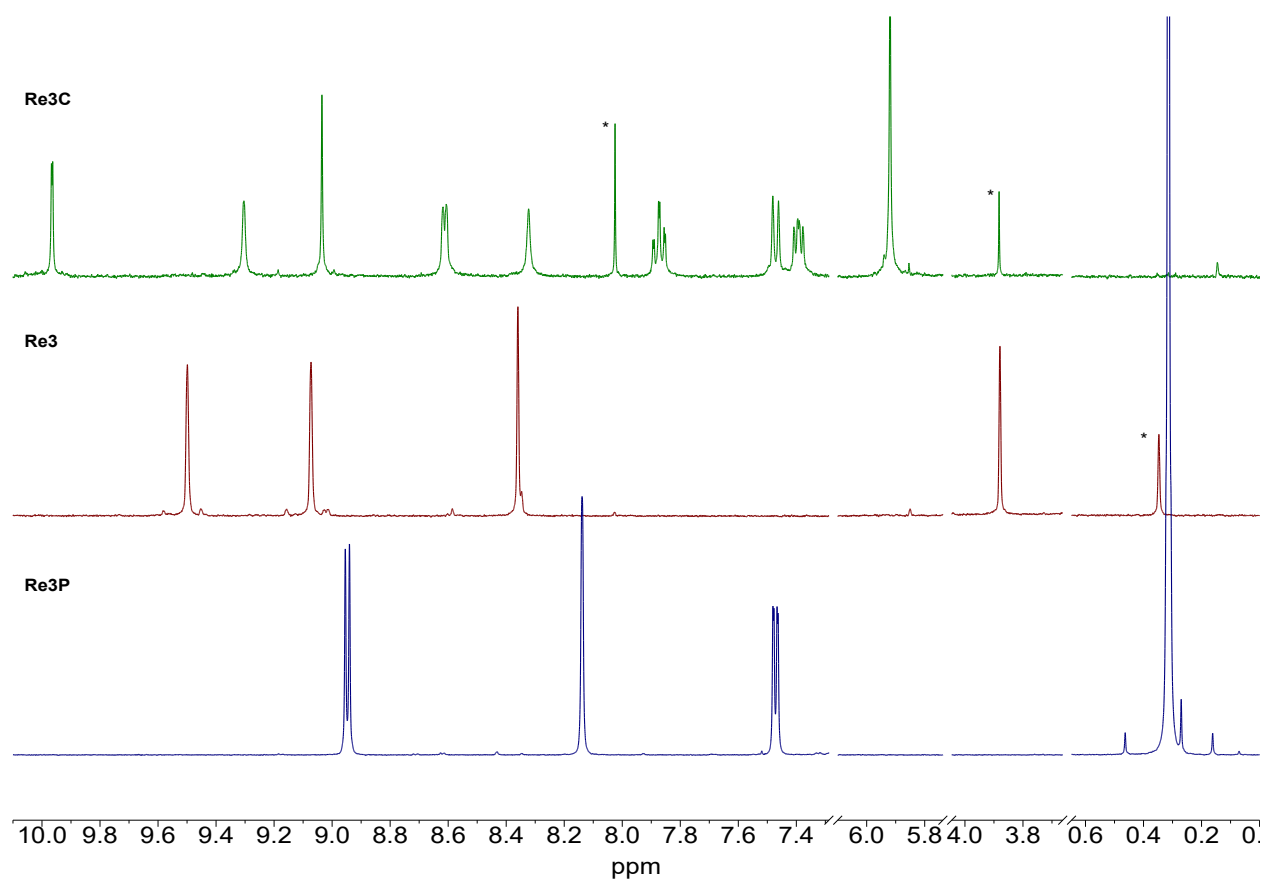

**Figure S4.**  $^1\text{H}$  NMR spectra of **Re3<sup>x</sup>** complexes. The resonances of admixtures are marked by asterisks.

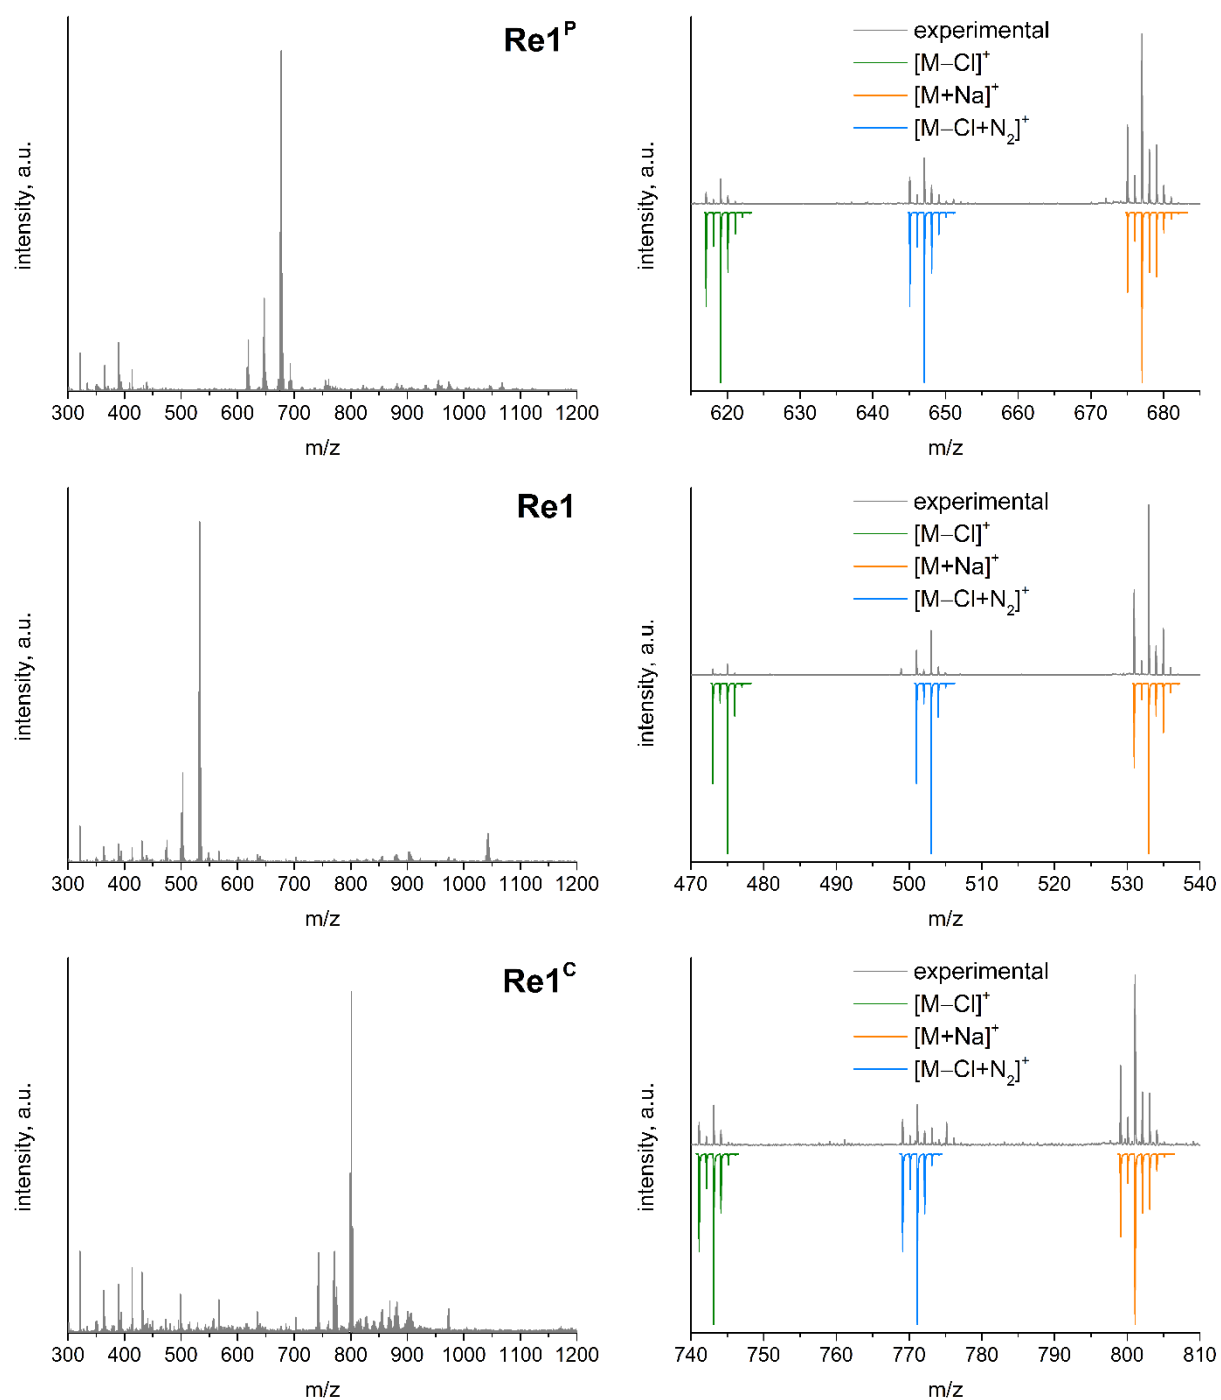

**Figure S5.** ESI<sup>+</sup> MS spectra of **Re1<sup>X</sup>** complexes with isotope pattern of key signals.

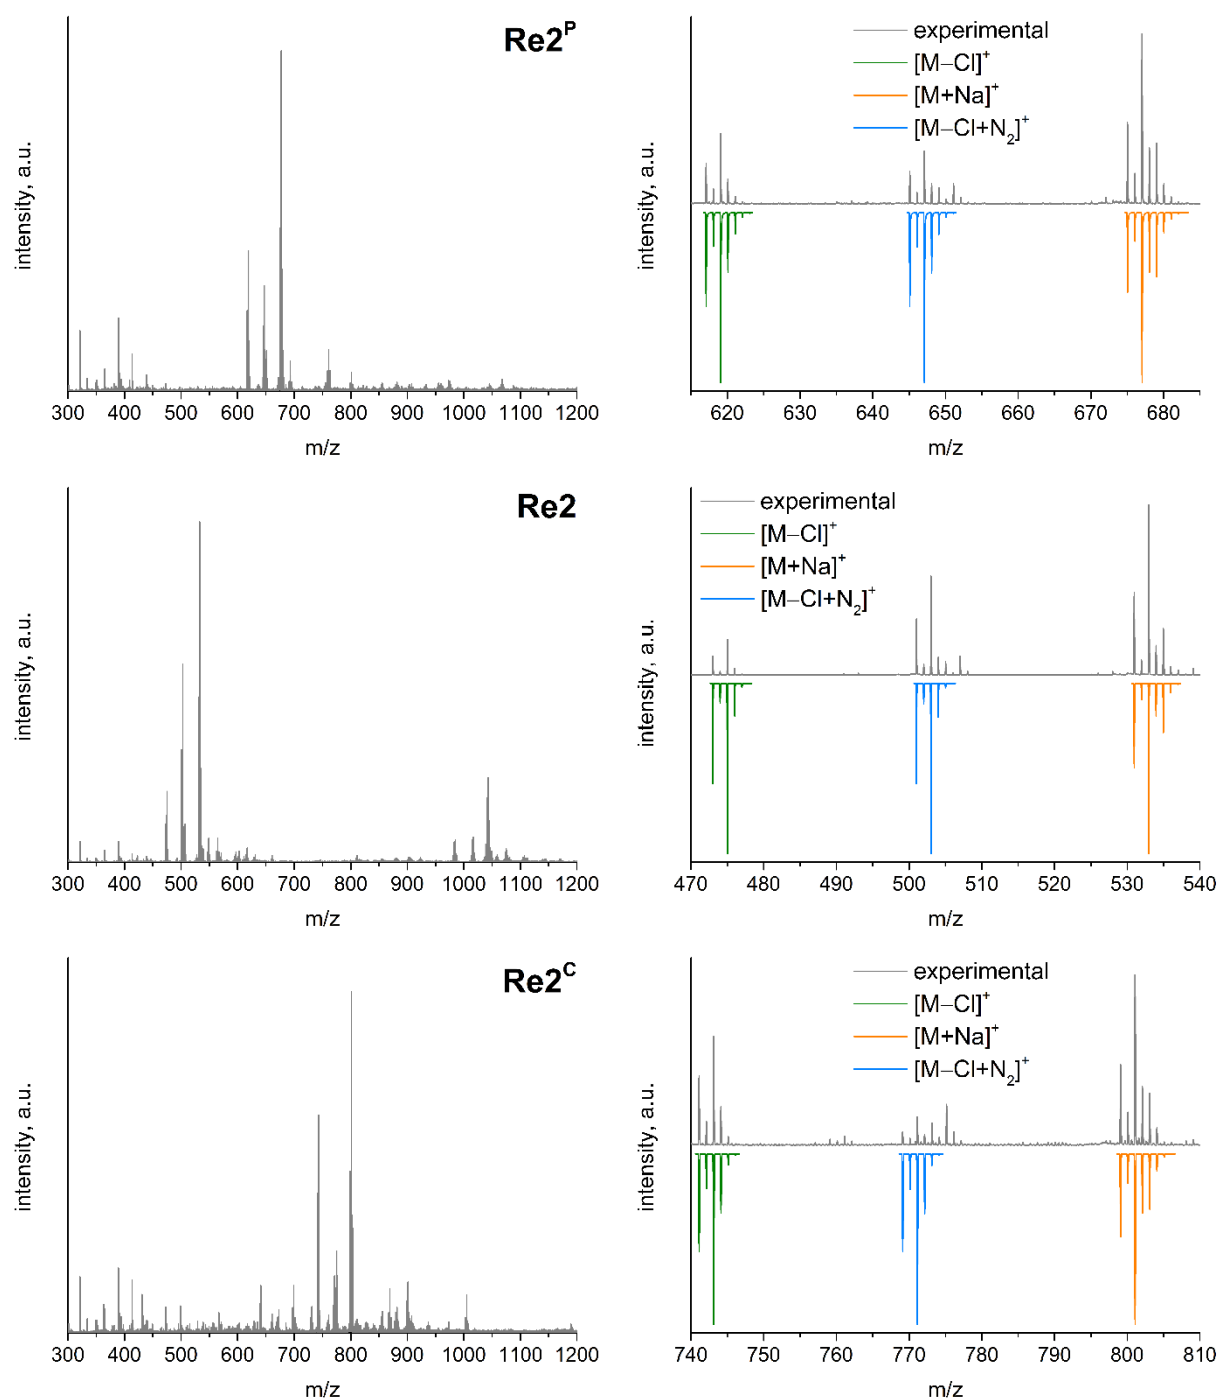

**Figure S6.** ESI<sup>+</sup> MS spectra of  $\text{Re}_2^{\text{X}}$  complexes with isotope pattern of key signals.

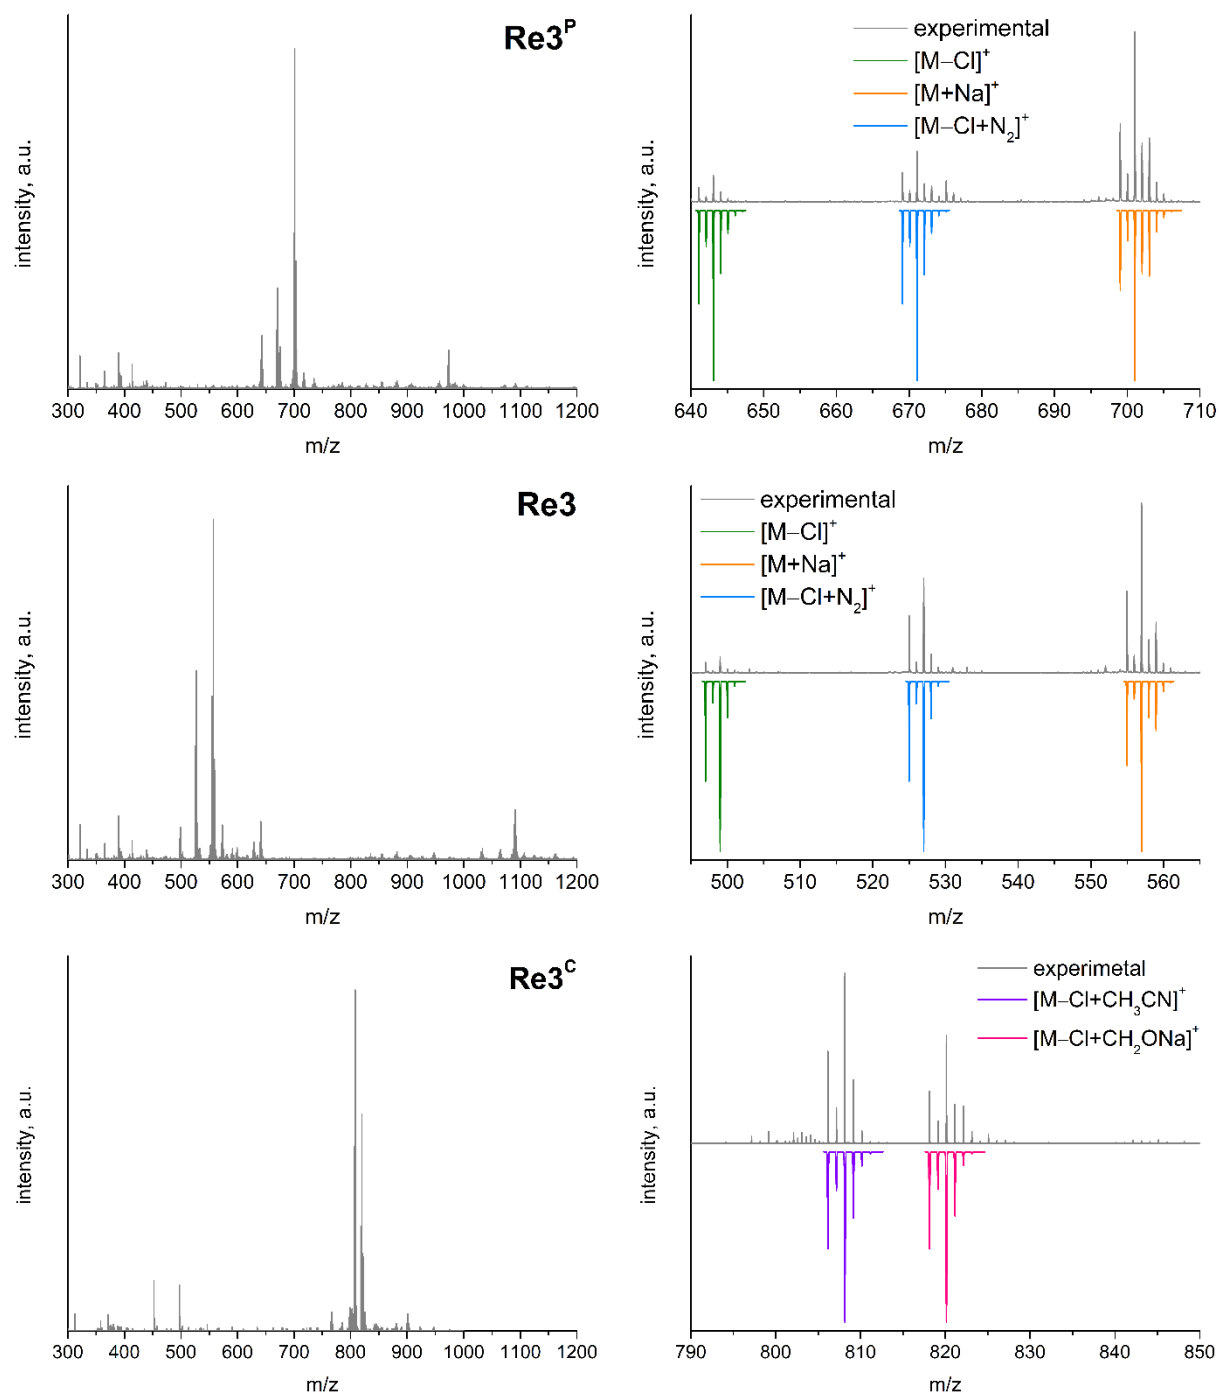

**Figure S7.** ESI<sup>+</sup> MS spectra of **Re3<sup>X</sup>** complexes with isotope pattern of key signals.

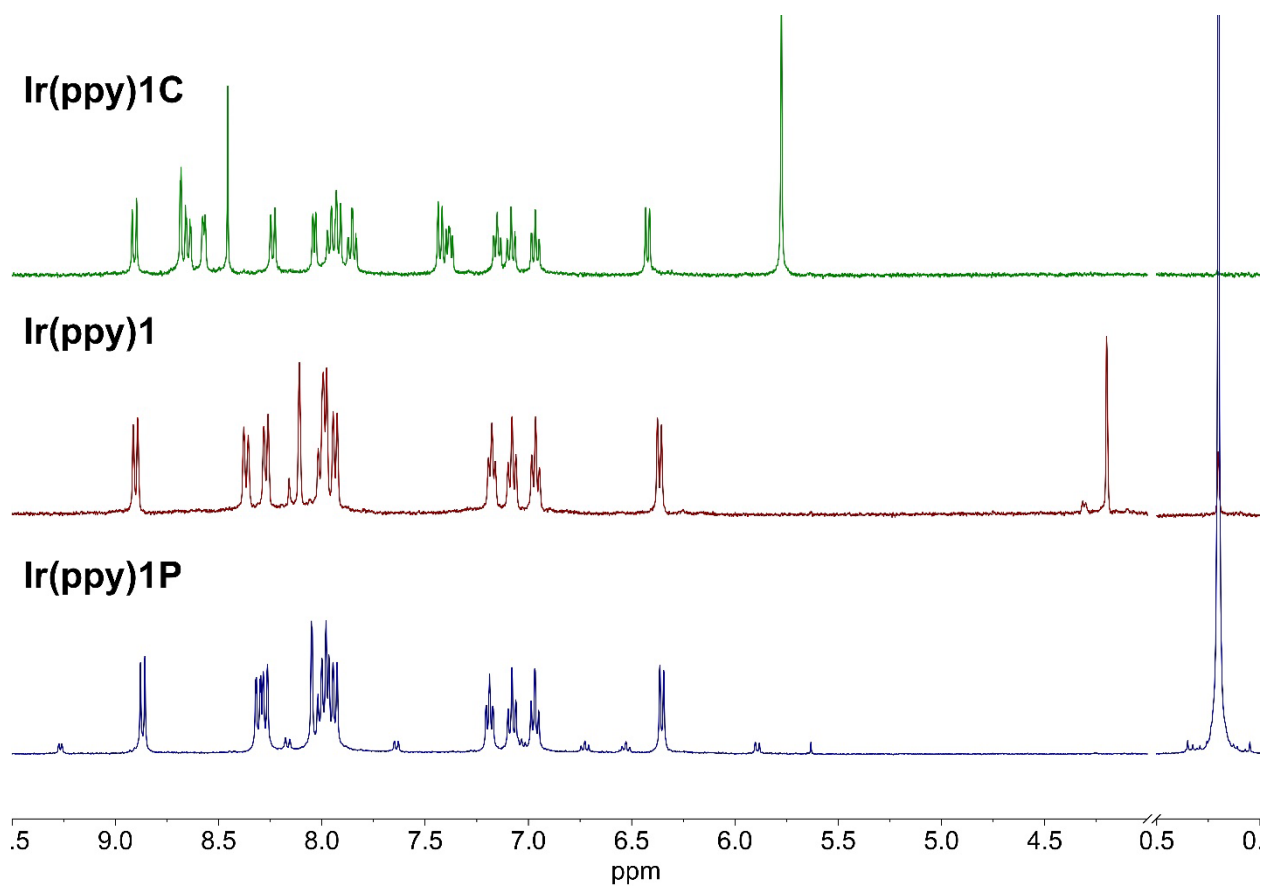

**Figure S8.**  $^1\text{H}$  NMR spectra of Ir(ppy) $1^X$  complexes.

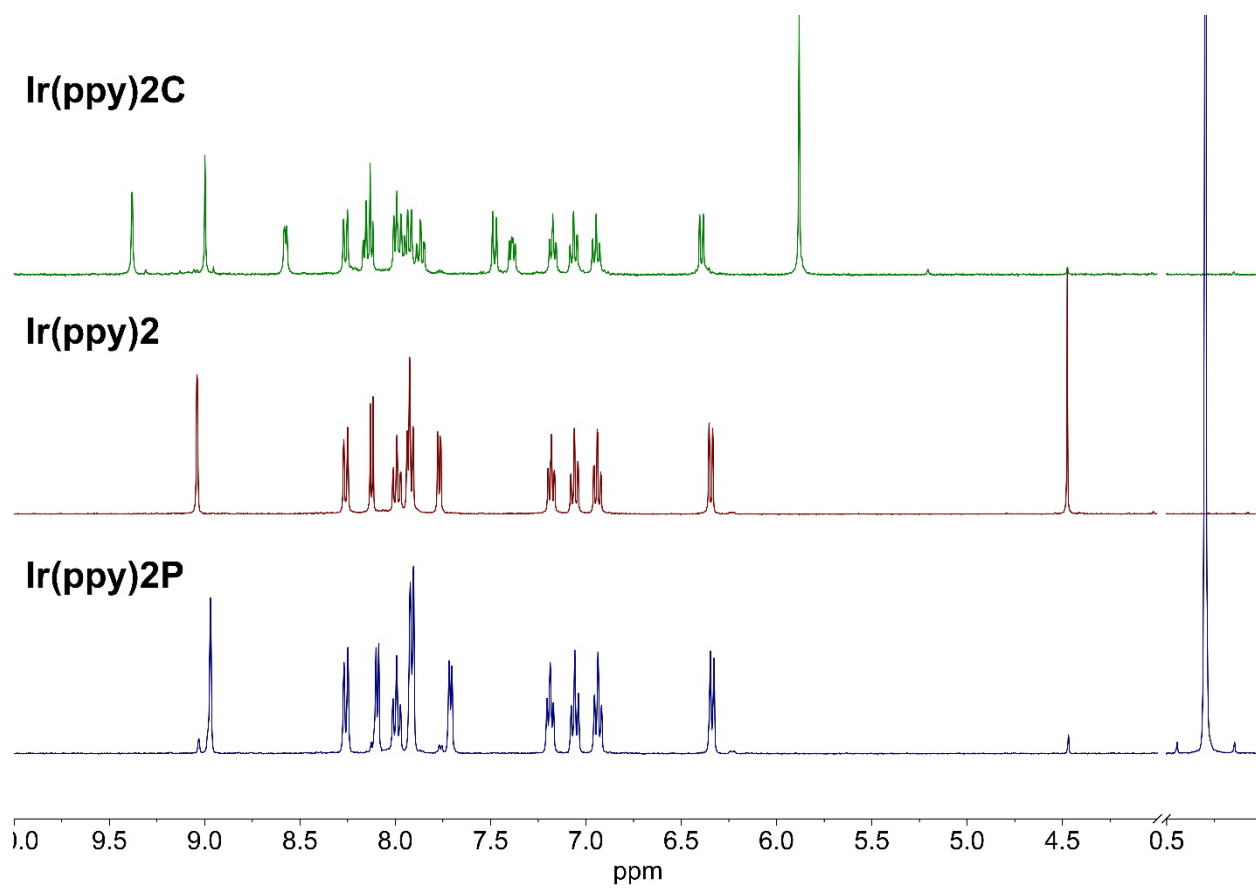

**Figure S9.**  $^1\text{H}$  NMR spectra of Ir(ppy) $_2^{\text{X}}$  complexes.

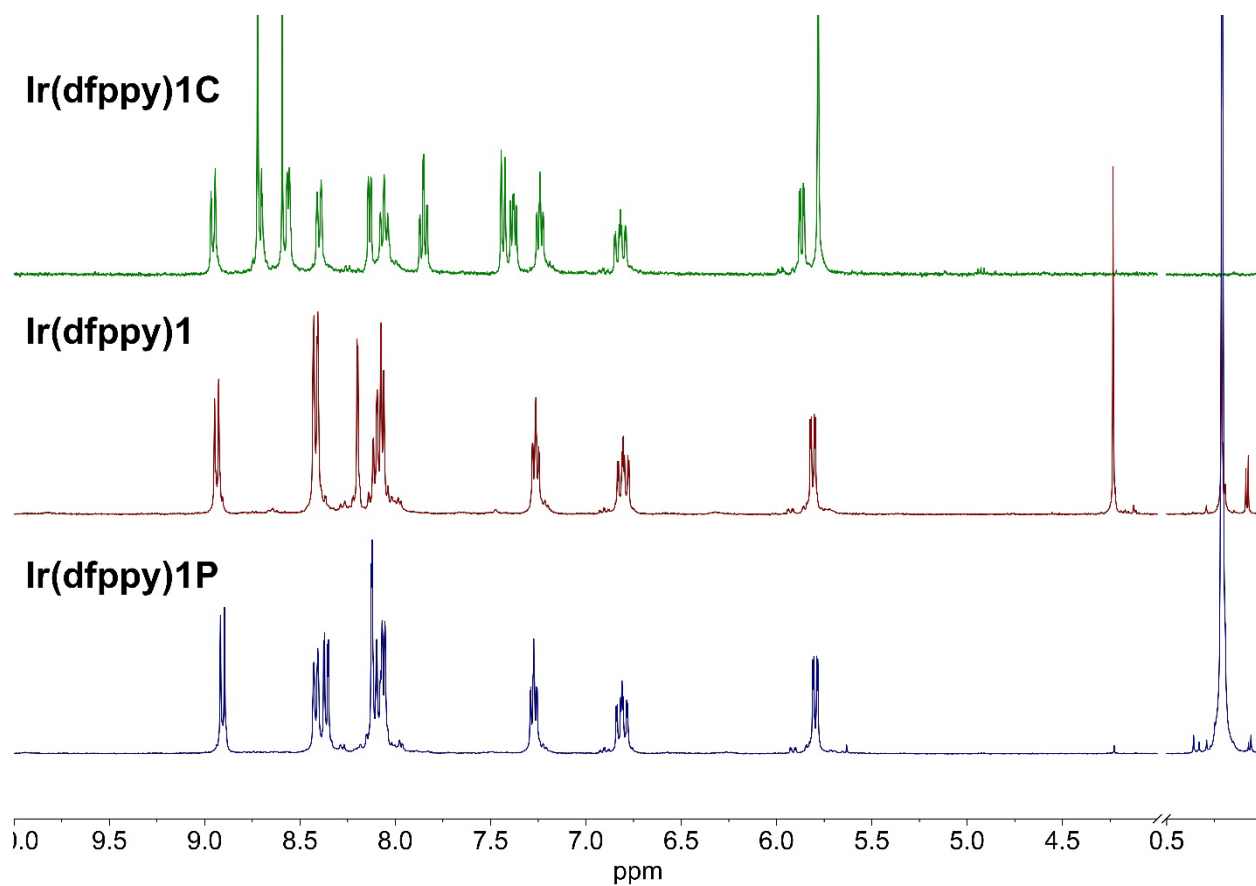

**Figure S10.**  $^1\text{H}$  NMR spectra of  $\text{Ir}(\text{dfppy})1^{\text{X}}$  complexes.

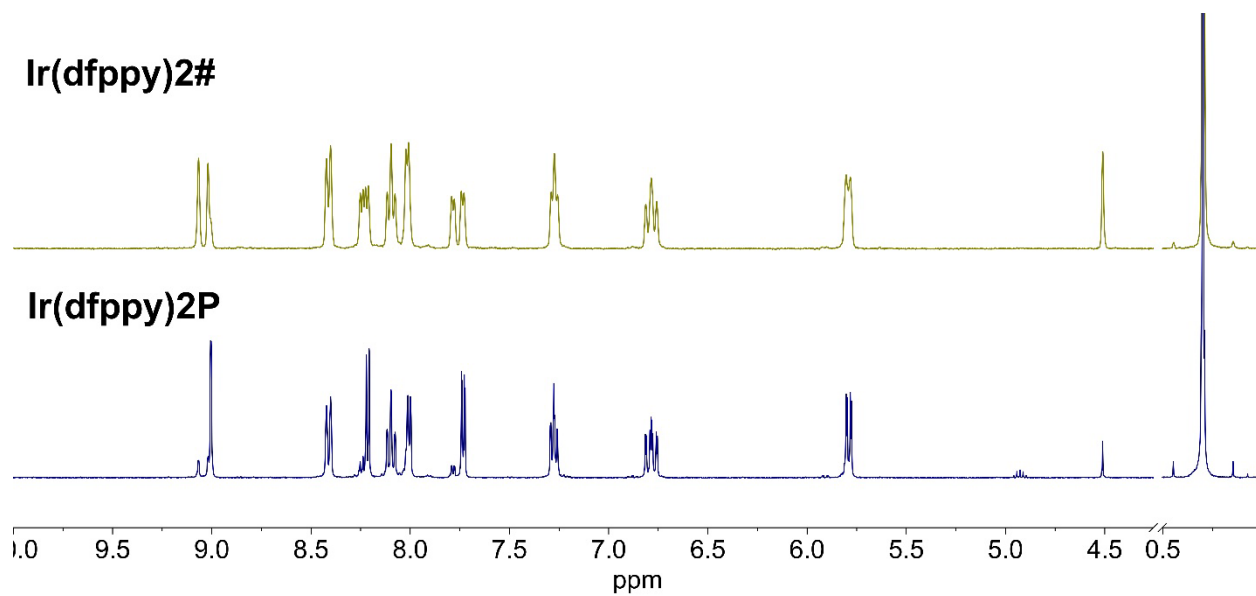

**Figure S11.**  $^1\text{H}$  NMR spectra of  $\text{Ir}(\text{dfppy})2^{\text{X}}$  complexes.

<sup>#</sup>Mixture of  $\text{Ir}(\text{dfppy})2^{\text{P}}$  and  $\text{Ir}(\text{dfppy})2$ .

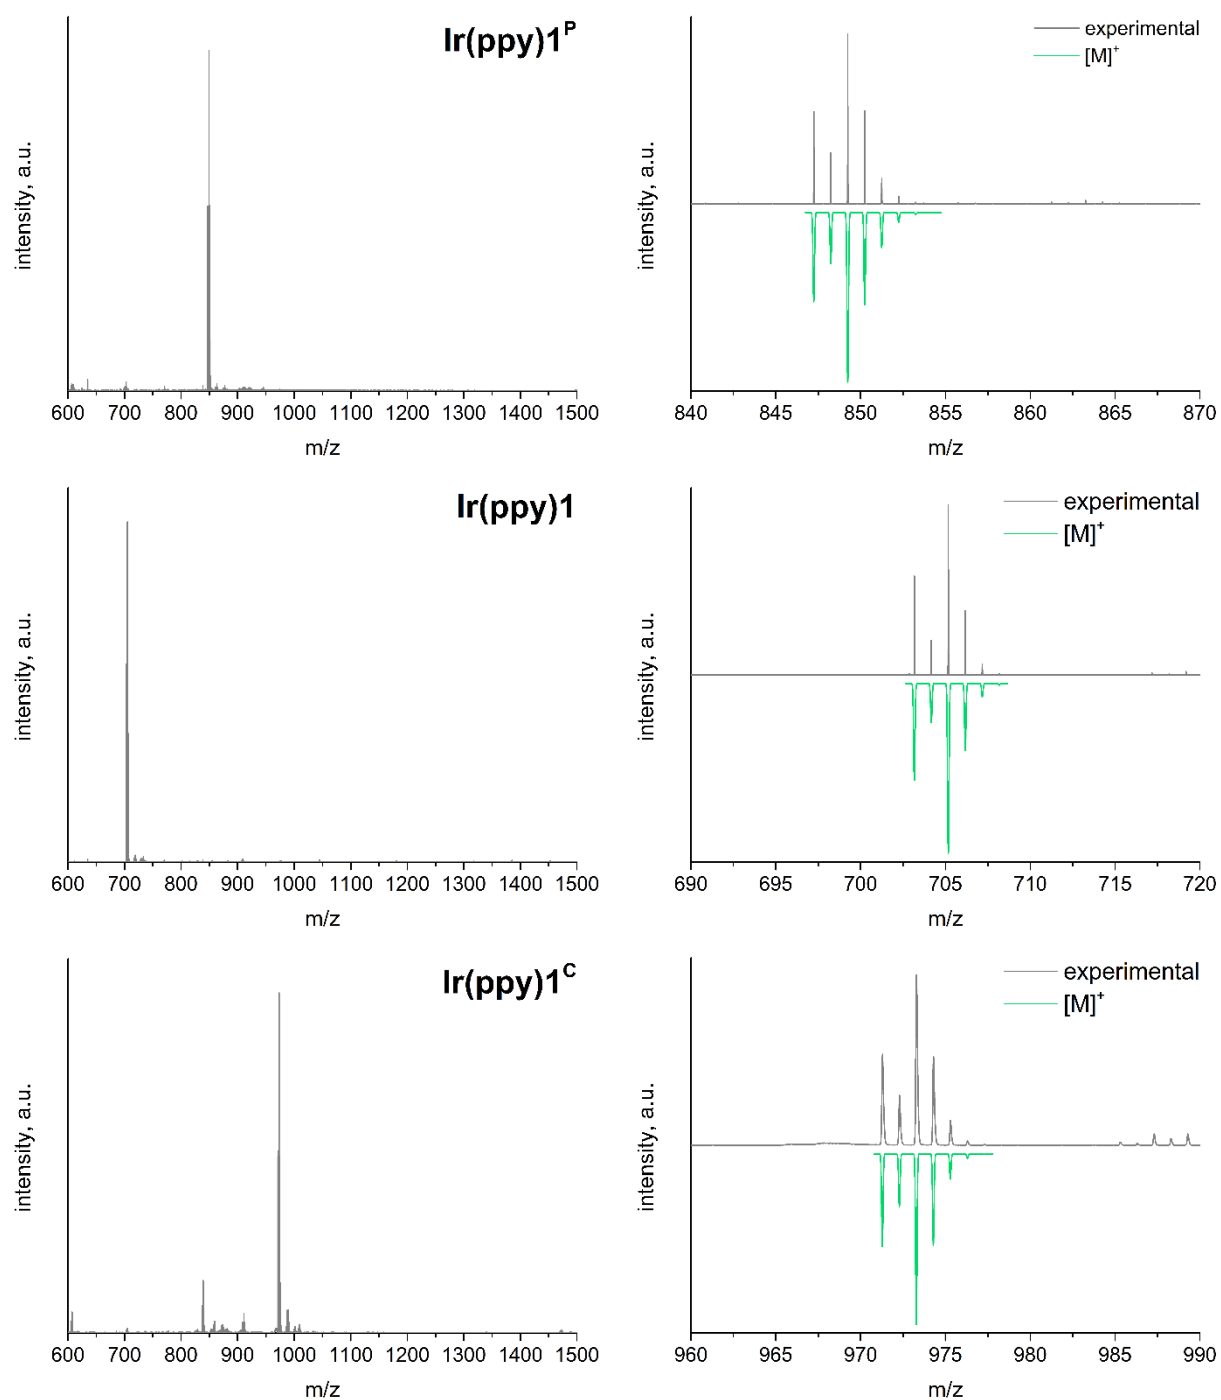

**Figure S12.** ESI<sup>+</sup> MS spectra of Ir(ppy)<sub>1</sub><sup>X</sup> complexes with isotope pattern of key signals.



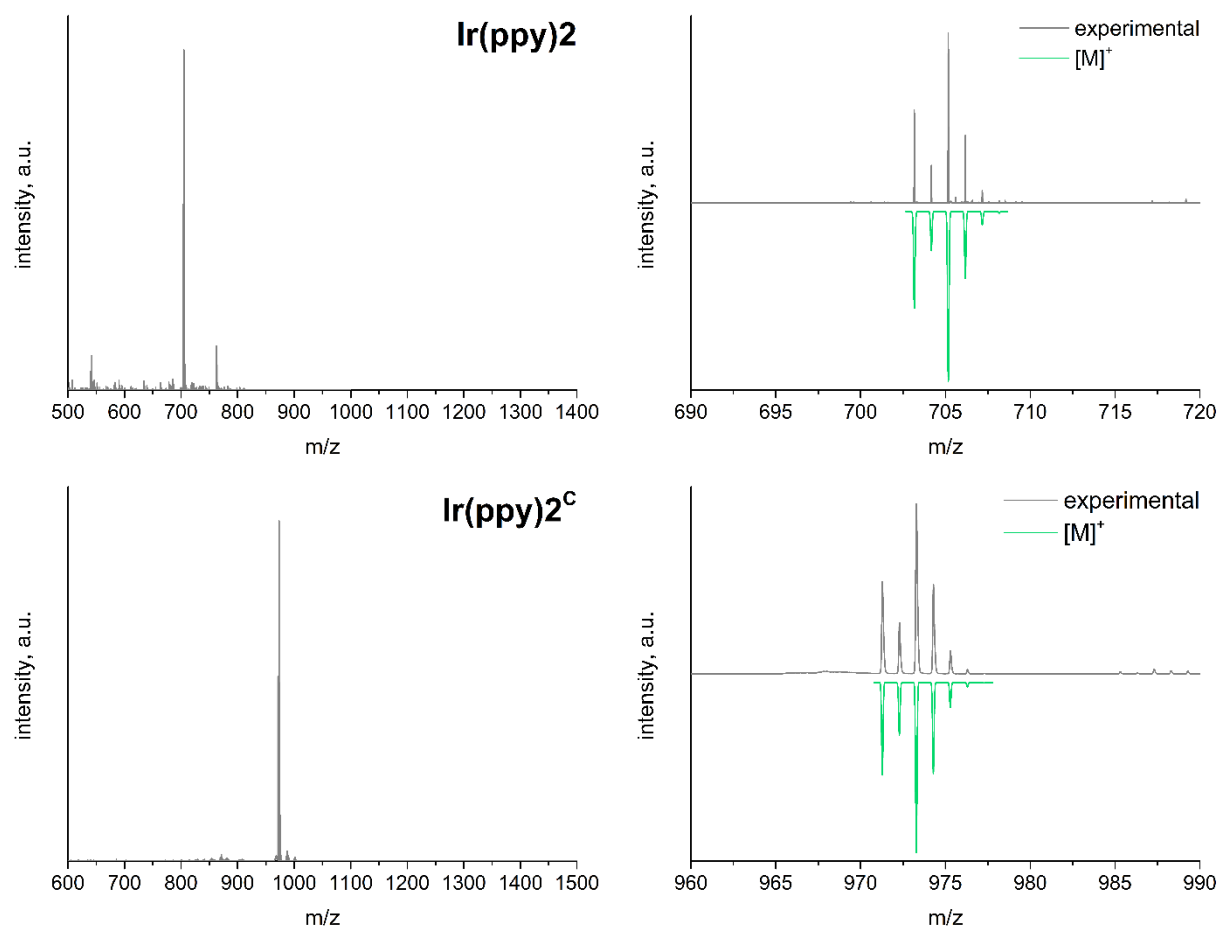

**Figure S13.** ESI<sup>+</sup> MS spectra of Ir(ppy)<sub>2</sub><sup>X</sup> complexes with isotope pattern of key signals.

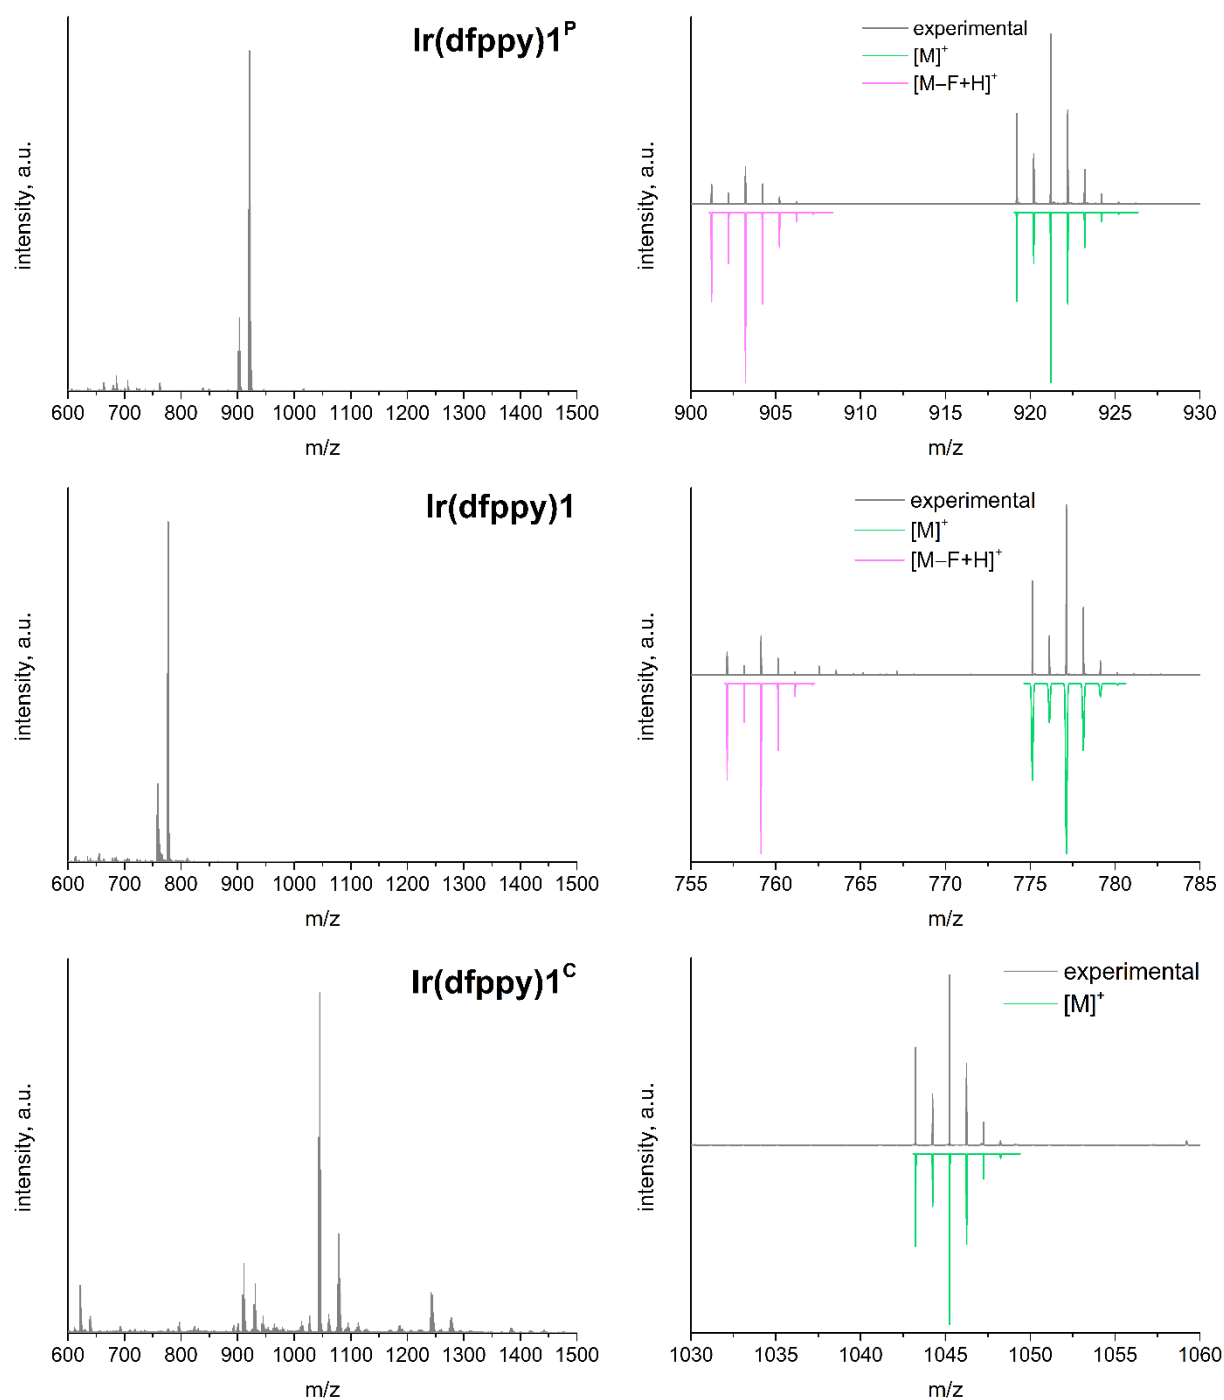

**Figure S14.** ESI<sup>+</sup> MS spectra of  $\text{Ir}(\text{dfppy})1^{\text{X}}$  complexes with isotope pattern of key signals.

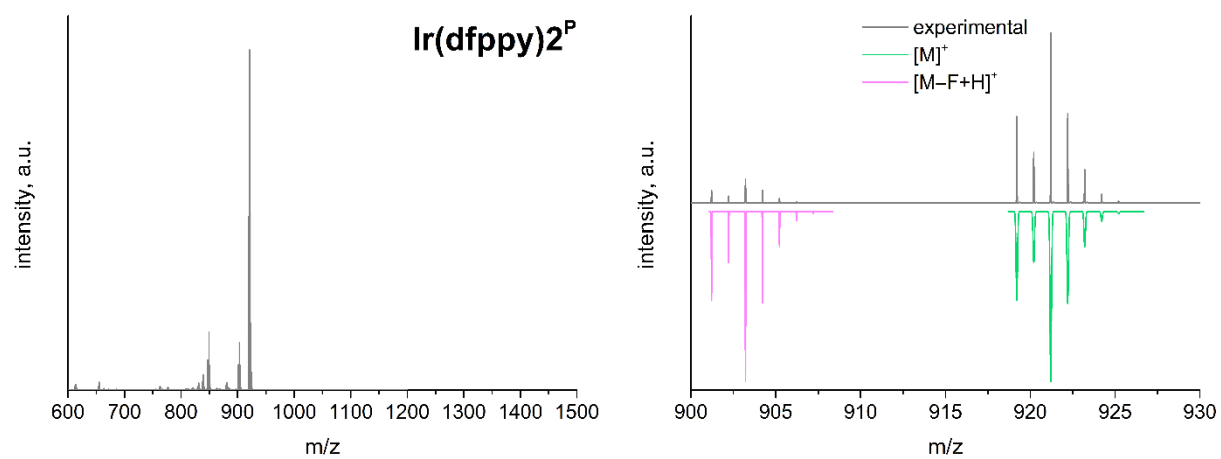

**Figure S15.** ESI<sup>+</sup> MS spectra of  $\text{Ir(dfppy)}_2\text{P}$  complexes with isotope pattern of key signals.

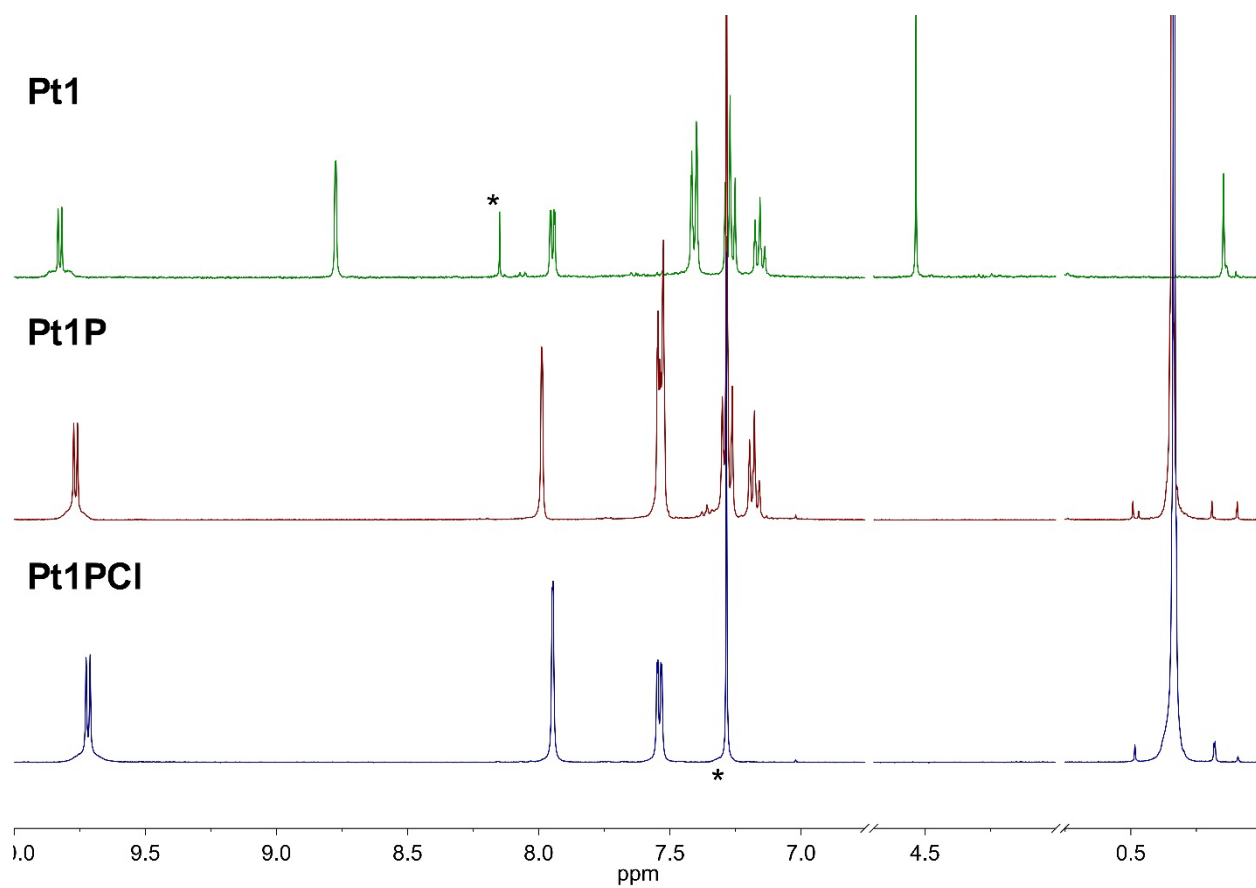

**Figure S16.**  $^1\text{H}$  NMR spectra of **Pt1<sup>X</sup>** complexes. Asterisks mark the resonances of admixtures and the residual solvent peak of  $\text{CDCl}_3$  (7.29 ppm).

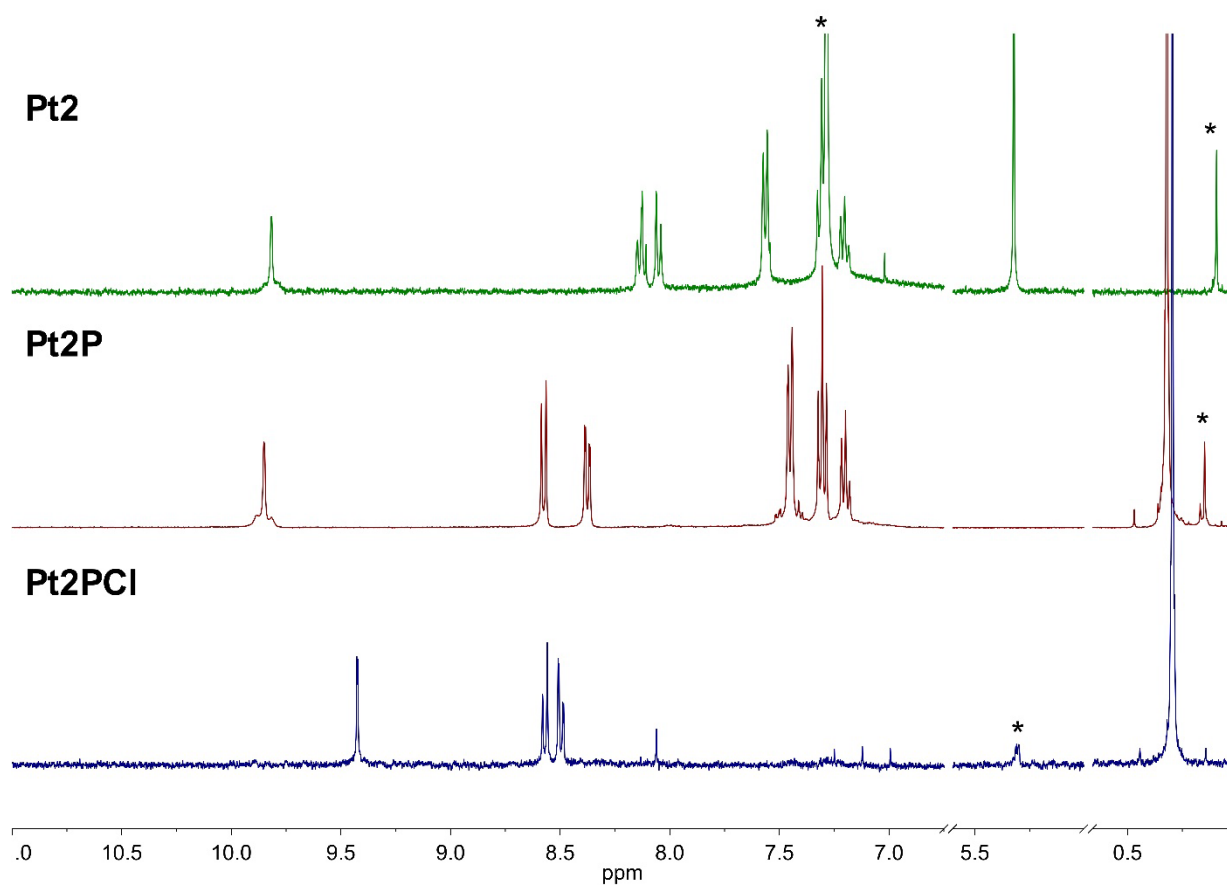

**Figure S17.**  $^1\text{H}$  NMR spectra of **Pt2<sup>x</sup>** complexes. Asterisks mark the resonances of admixtures and the residual solvent peak of  $\text{CDCl}_3$  (7.29 ppm).

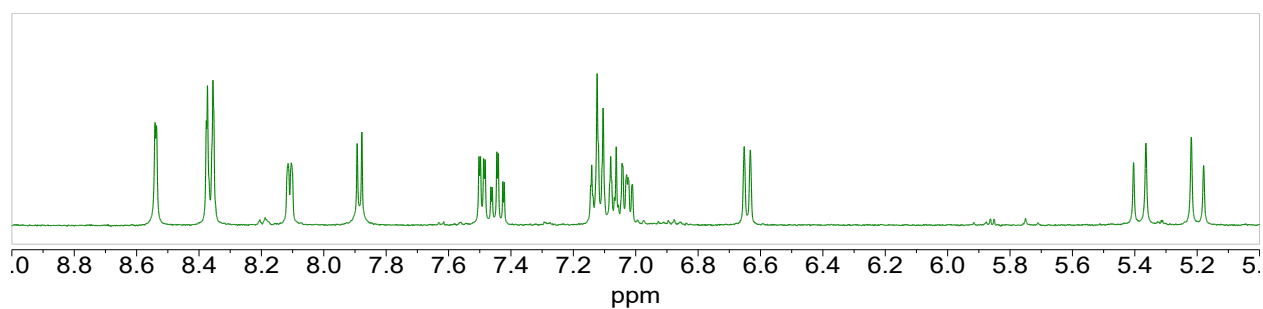

**Figure S18.**  $^1\text{H}$  NMR spectrum of  $\text{Pt}(\text{btbp})^{\text{C}}$  complexes in aromatic region,  $\text{DMSO-d}_6$ , RT.

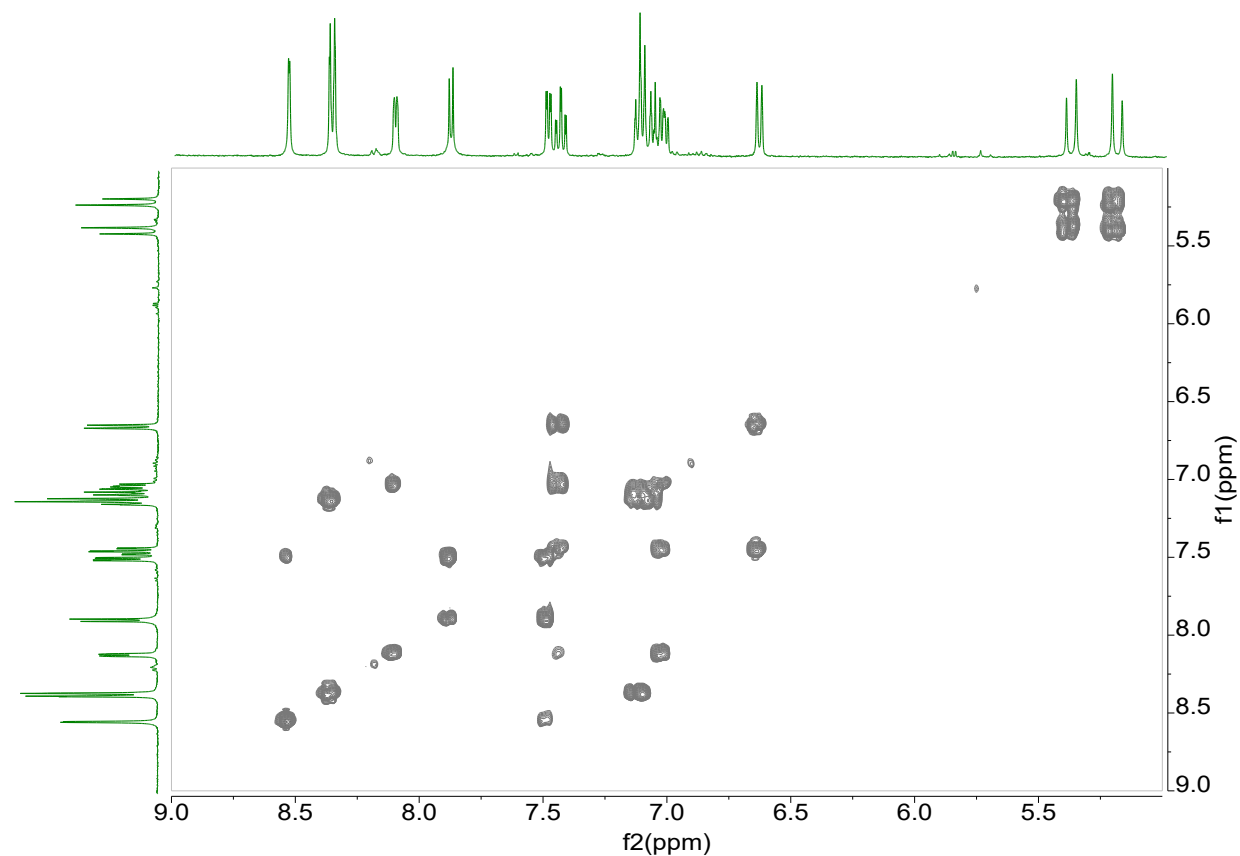

**Figure S19.**  $^1\text{H}$  $^1\text{H}$  COSY NMR spectrum of  $\text{Pt}(\text{btbp})^{\text{C}}$  complexes in aromatic region,  $\text{DMSO-d}_6$ , RT.

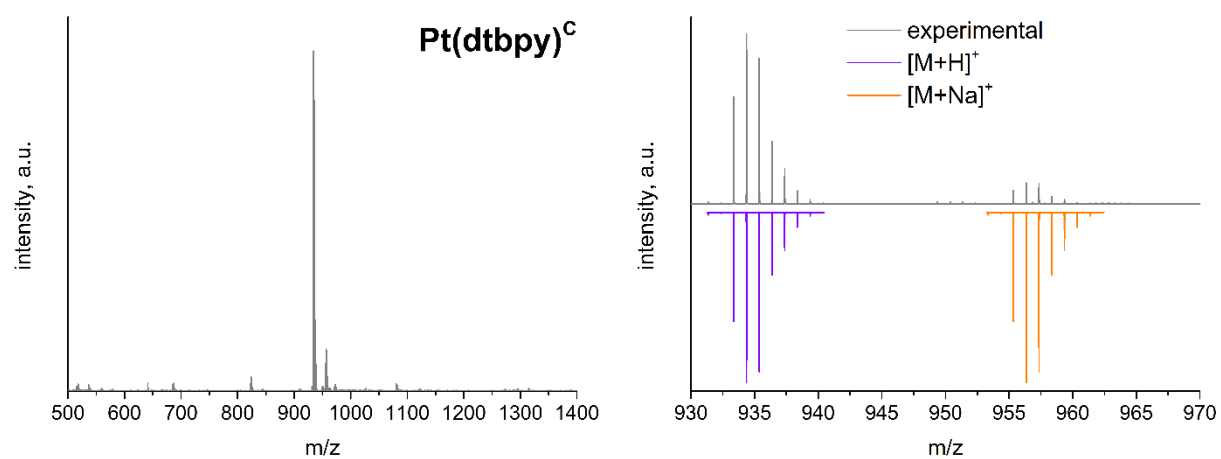

**Figure S20.** ESI<sup>+</sup> MS spectrum of  $\text{Pt}(\text{dtbpy})^{\text{C}}$  complex with isotope pattern of key signals.

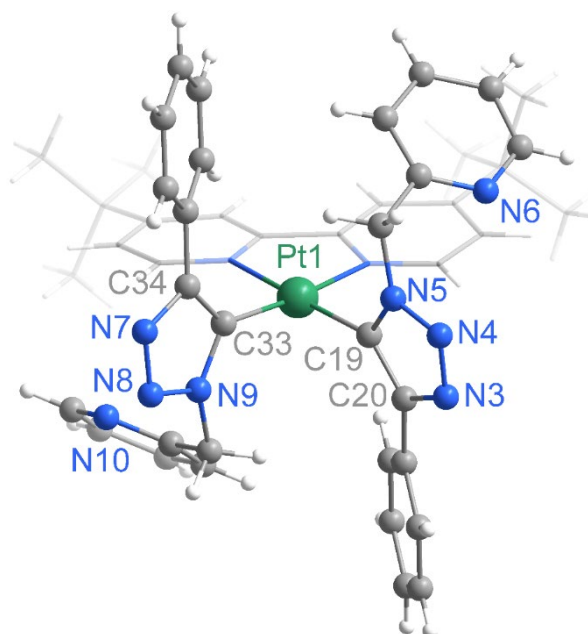

**Figure S21.** Molecular structure of  $\text{Pt}(\text{dtbpy})^{\text{C}}$  complex with key atoms numeration.

**Table S2.** Selected structural parameters for compound **Pt(dtbp)<sup>C</sup>** and literature data for Pt(II) triazolyl derivatives [5,6].

| Bond lengths, Å        |           | Literature reported range, Å |
|------------------------|-----------|------------------------------|
| Pt1–N1                 | 2.078(2)  | 1.959 – 2.077                |
| Pt1–N2                 | 2.079(2)  |                              |
| Pt1–C19                | 2.010(2)  | 1.989 – 2.007                |
| Pt1–C33                | 2.001(3)  |                              |
| C19–C20                | 1.394(4)  | 1.376 – 1.407                |
| C33–C34                | 1.394(4)  |                              |
| N3–N4                  | 1.305(3)  | 1.306 – 1.322                |
| N7–N8                  | 1.309(3)  |                              |
| N4–N5                  | 1.354(3)  | 1.351 – 1.386                |
| N8–N9                  | 1.354(3)  |                              |
| Bond angles, °         |           | Literature data, °           |
| N1–Pt1–N2              | 78.29 (9) | 76.86                        |
| C19–Pt1–C40            | 88.02(10) | 88.55                        |
| Plane angle, °         |           | Literature data, °           |
| Pt–N1–N2 ring–C19 ring | 95.543    | 87.38                        |
| Pt–N1–N2 ring–C33 ring | 95.586    |                              |

**Table S3.** Photophysical properties of “clicked” complexes **ReX<sup>C</sup>** and **IrX<sup>C</sup>**, DCE, r.t., 10<sup>−5</sup> M.

|                               | $\lambda$ , nm ( $\epsilon$ , 10 <sup>−3</sup> cm <sup>−1</sup> M <sup>−1</sup> ) | $\lambda_{\text{em}}$ , nm | $\Phi$ , % |      | $\tau$ , $\mu$ s |      |
|-------------------------------|-----------------------------------------------------------------------------------|----------------------------|------------|------|------------------|------|
|                               |                                                                                   |                            | A          | D    | A                | D    |
| <b>Re1<sup>C</sup></b>        | 291 (28.5), 351 (31.8), 365 (32)                                                  | 660                        | <1         | <1   | 0.24             | 0.22 |
| <b>Re2<sup>C</sup></b>        | 291 (43.4)                                                                        | 650                        | <1         | <1   | 0.49             | 0.52 |
| <b>Re3<sup>C</sup></b>        | 280 (47.8), 342 (31.8)                                                            | 645                        | <1         | <1   | 0.88             | 0.87 |
| <b>Ir(dfppy)1<sup>C</sup></b> | 252 (33.9), 307 (25.3),<br>357 (26.1)                                             | 533                        | 7.7        | 42.7 | 0.79             | 2.14 |
| <b>Ir(ppy)1<sup>C</sup></b>   | 254 (65.7), 297 (50.8),<br>343 (42.5), 357 (43.1)                                 | 626                        | 7.7        | 19.2 | 0.22             | 0.35 |
| <b>Ir(ppy)2<sup>C</sup></b>   | 267 (94.4), 365 (18.8)                                                            | 609                        | 7.1        | 37.9 | 0.22             | 0.42 |

A = aerated. D = degassed.



## References

1. *CrysAlisPro*, Rigaku Oxford Diffraction; Agilent Technologies: Version 1.171.39.35a, 2017;
2. Sheldrick, G.M. SHELXT - Integrated space-group and crystal-structure determination. *Acta Crystallogr. Sect. A Found. Crystallogr.* **2015**, *71*, 3–8, doi:10.1107/S2053273314026370.
3. Sheldrick, G.M. Crystal structure refinement with SHELXL. *Acta Crystallogr. Sect. C* **2015**, *71*, 3–8, doi:10.1107/S2053229614024218.
4. Dolomanov, O. V.; Bourhis, L.J.; Gildea, R.J.; Howard, J.A.K.; Puschmann, H. OLEX2 : a complete structure solution, refinement and analysis program. *J. Appl. Crystallogr.* **2009**, *42*, 339–341, doi:10.1107/S0021889808042726.
5. Li, Y.; Tsang, D.P.; Chan, C.K.; Wong, K.M.; Chan, M.; Yam, V.W. Synthesis of Unsymmetric Bipyridine–Pt II –Alkynyl Complexes through Post-Click Reaction with Emission Enhancement Characteristics and Their Applications as Phosphorescent Organic Light-Emitting Diodes. *Chem. – A Eur. J.* **2014**, *20*, 13710–13715, doi:10.1002/chem.201404315.
6. Guha, R.; Defayay, D.; Hepp, A.; Müller, J. Targeting Guanine Quadruplexes with Luminescent Platinum(II) Complexes Bearing a Pendant Nucleobase. *Chempluschem* **2021**, *86*, 662–673, doi:10.1002/cplu.202100135.
